# Supplementary material
Source: publisher site journal article supplement (https://www.dovepress.com/article/557108)
Supplement: Supplementary file 1 [file 557108_Supplementary%20material_1.docx]

**Supplementary Material**


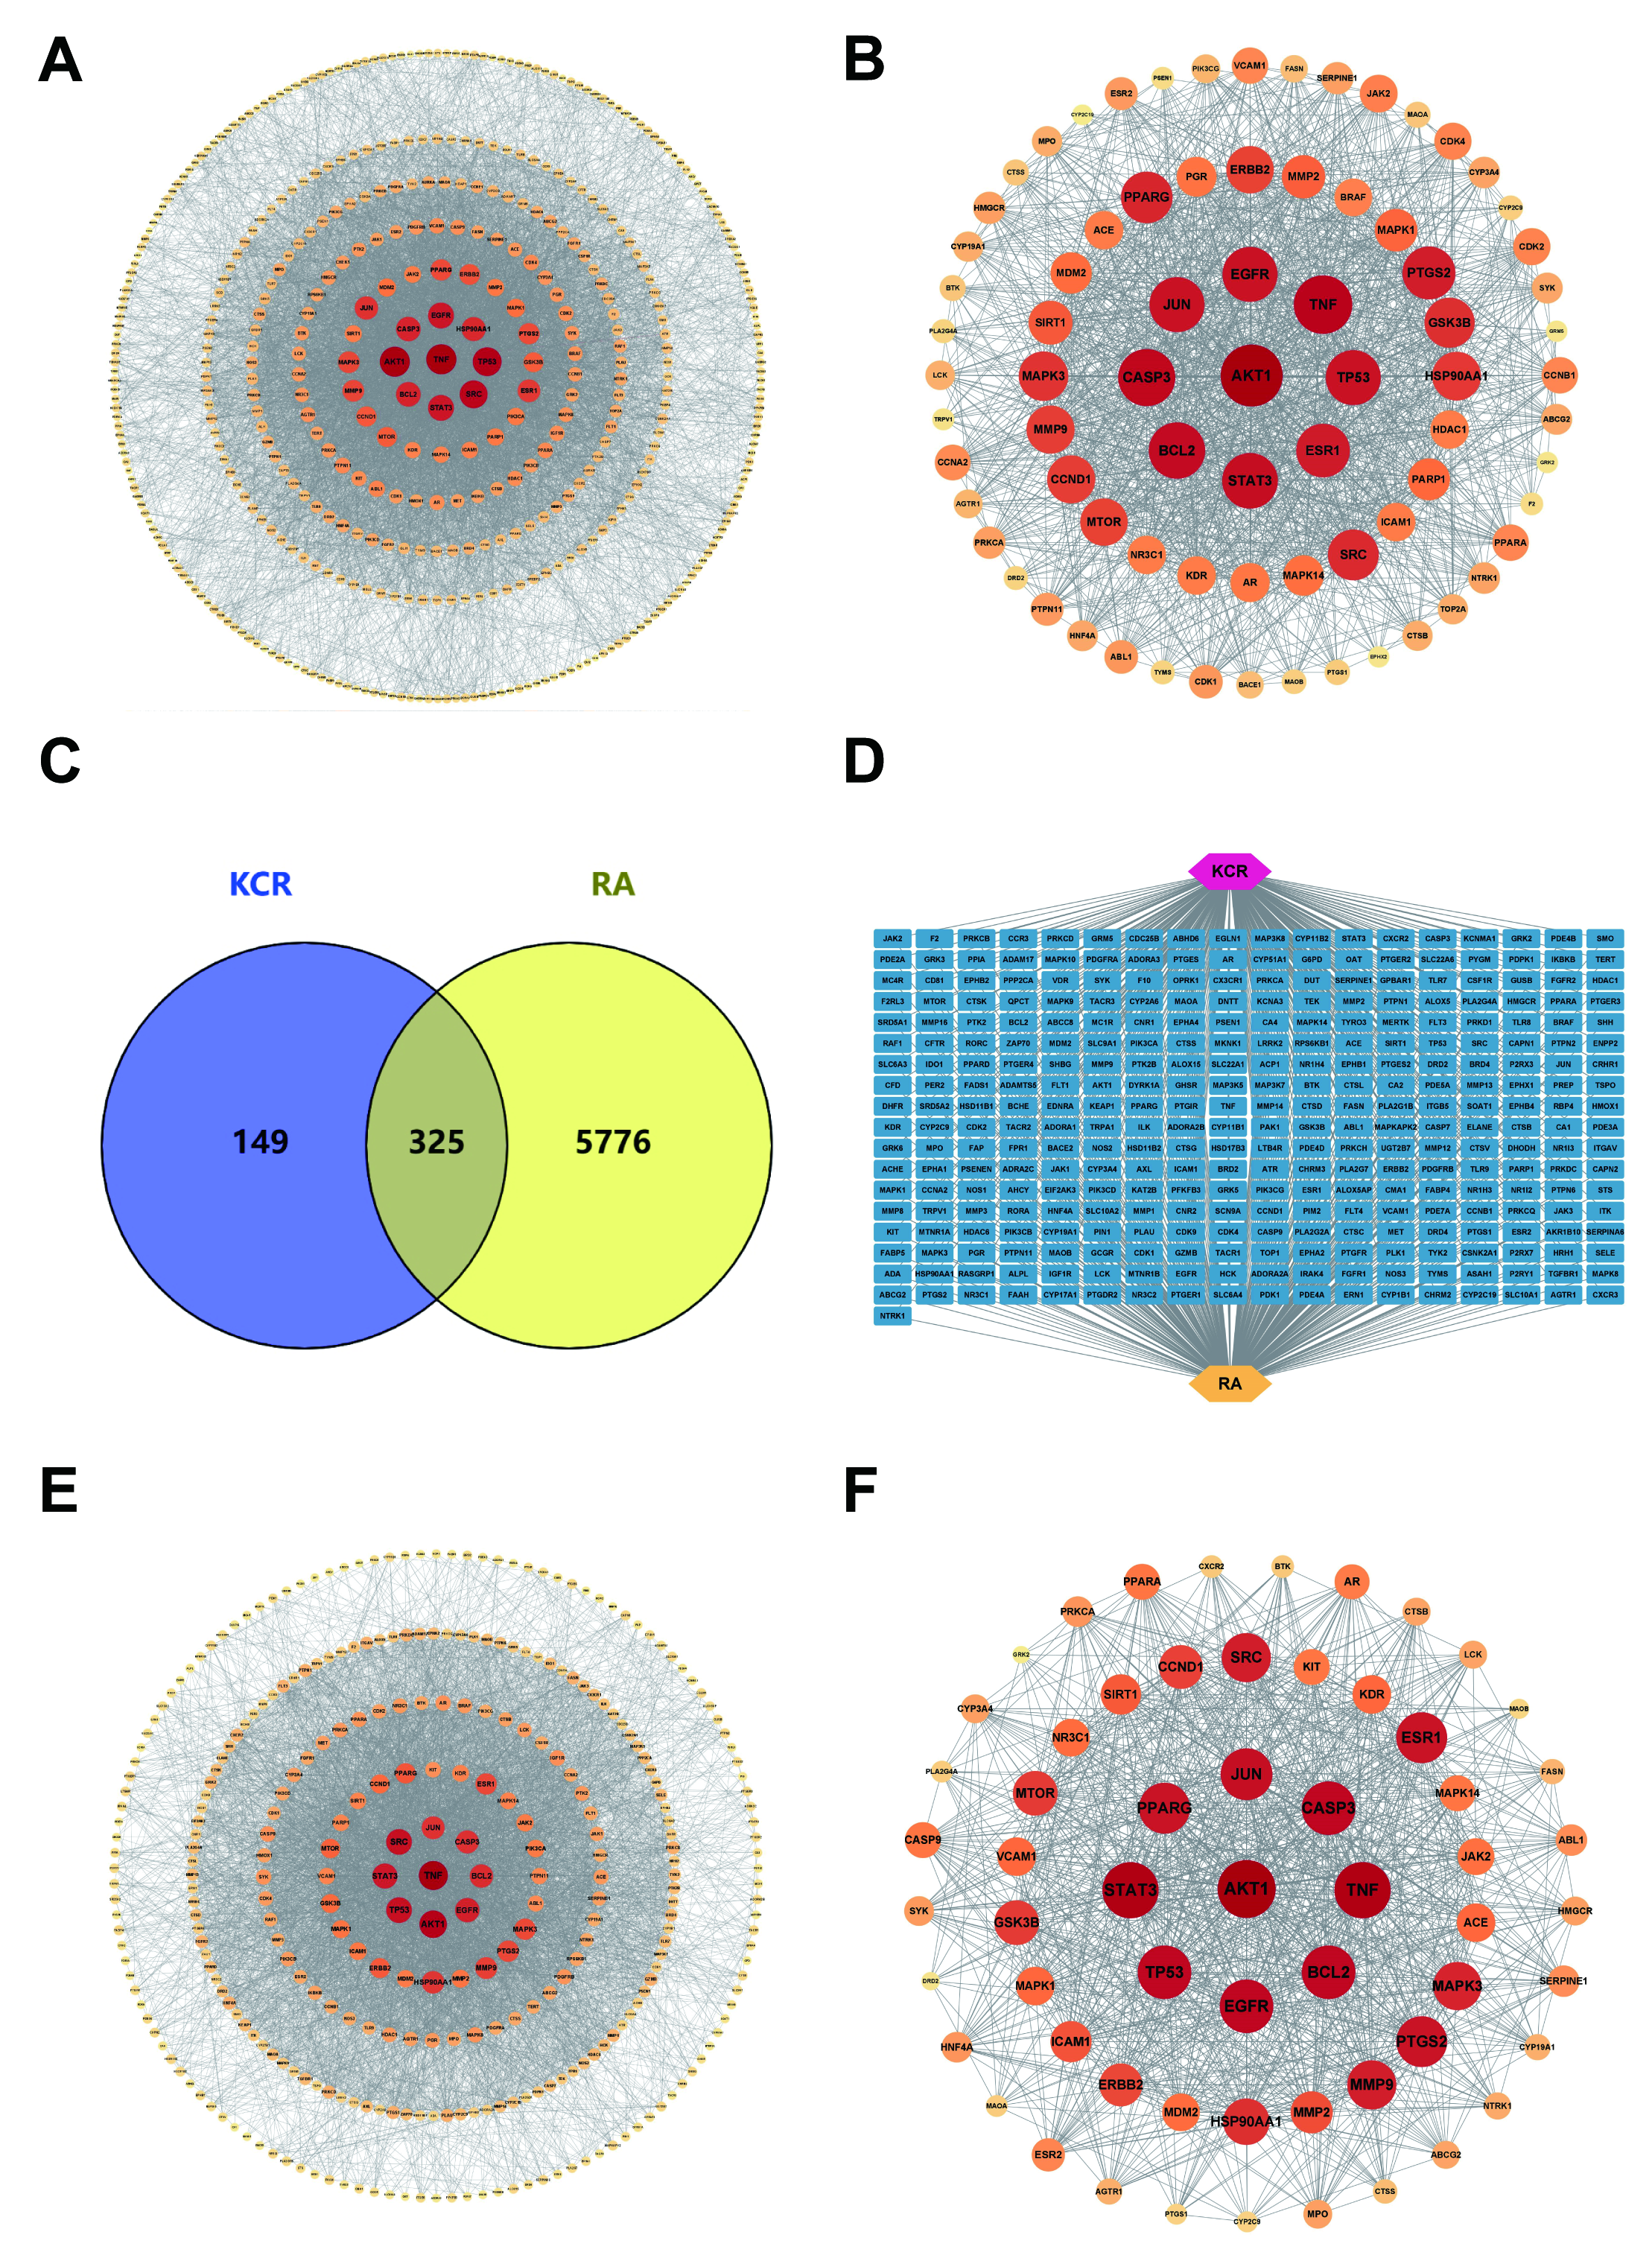


**Fig. S1.** Screening for interacting targets of RA and KCR. (A) PPI network of potential therapeutic targets for KCR. (B) 77 KCR core targets had higher than average BC, CC and Degree values. (C and D) 325 interacting targets between RA and KCR. (E) PPI network of RA and KCR. (F) PPI network of core targets of KCR for RA.


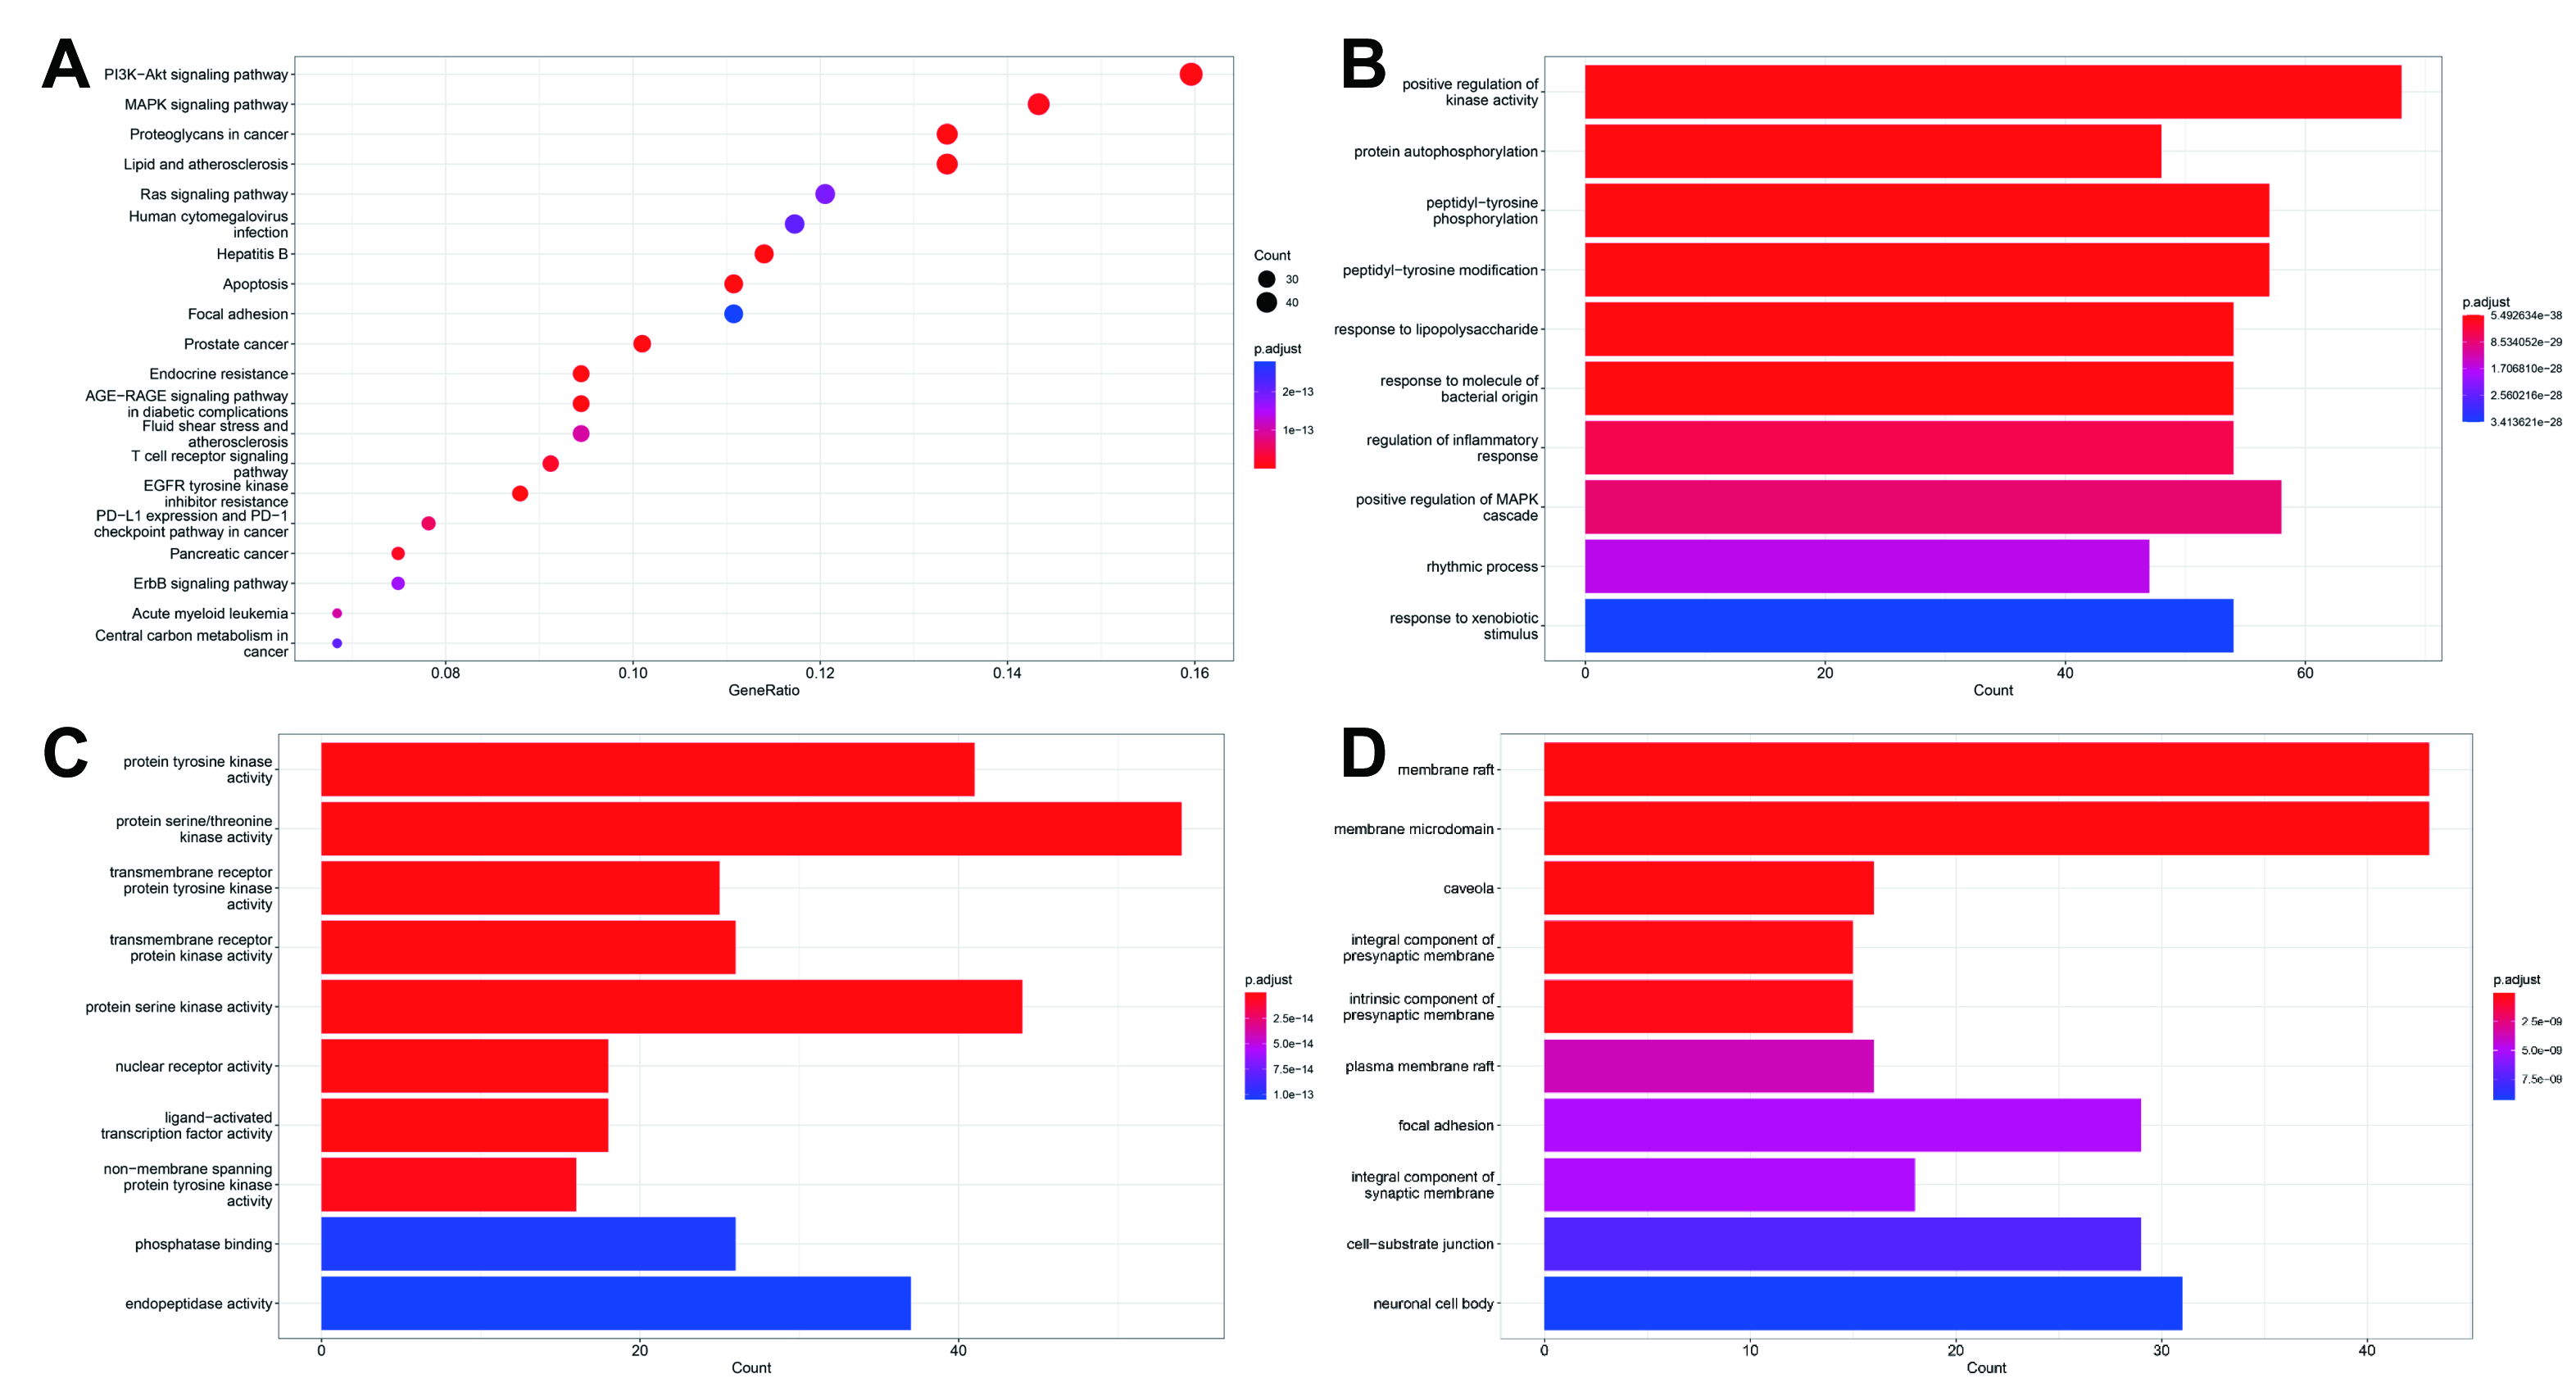


**Fig. S2.** KEGG and GO analysis of interacting targets of RA and KCR. (A) KEGG analysis of interacting targets of RA and KCR. (B, C and D) GO (BP, MF, and CC) analysis of interacting targets of RA and KCR.


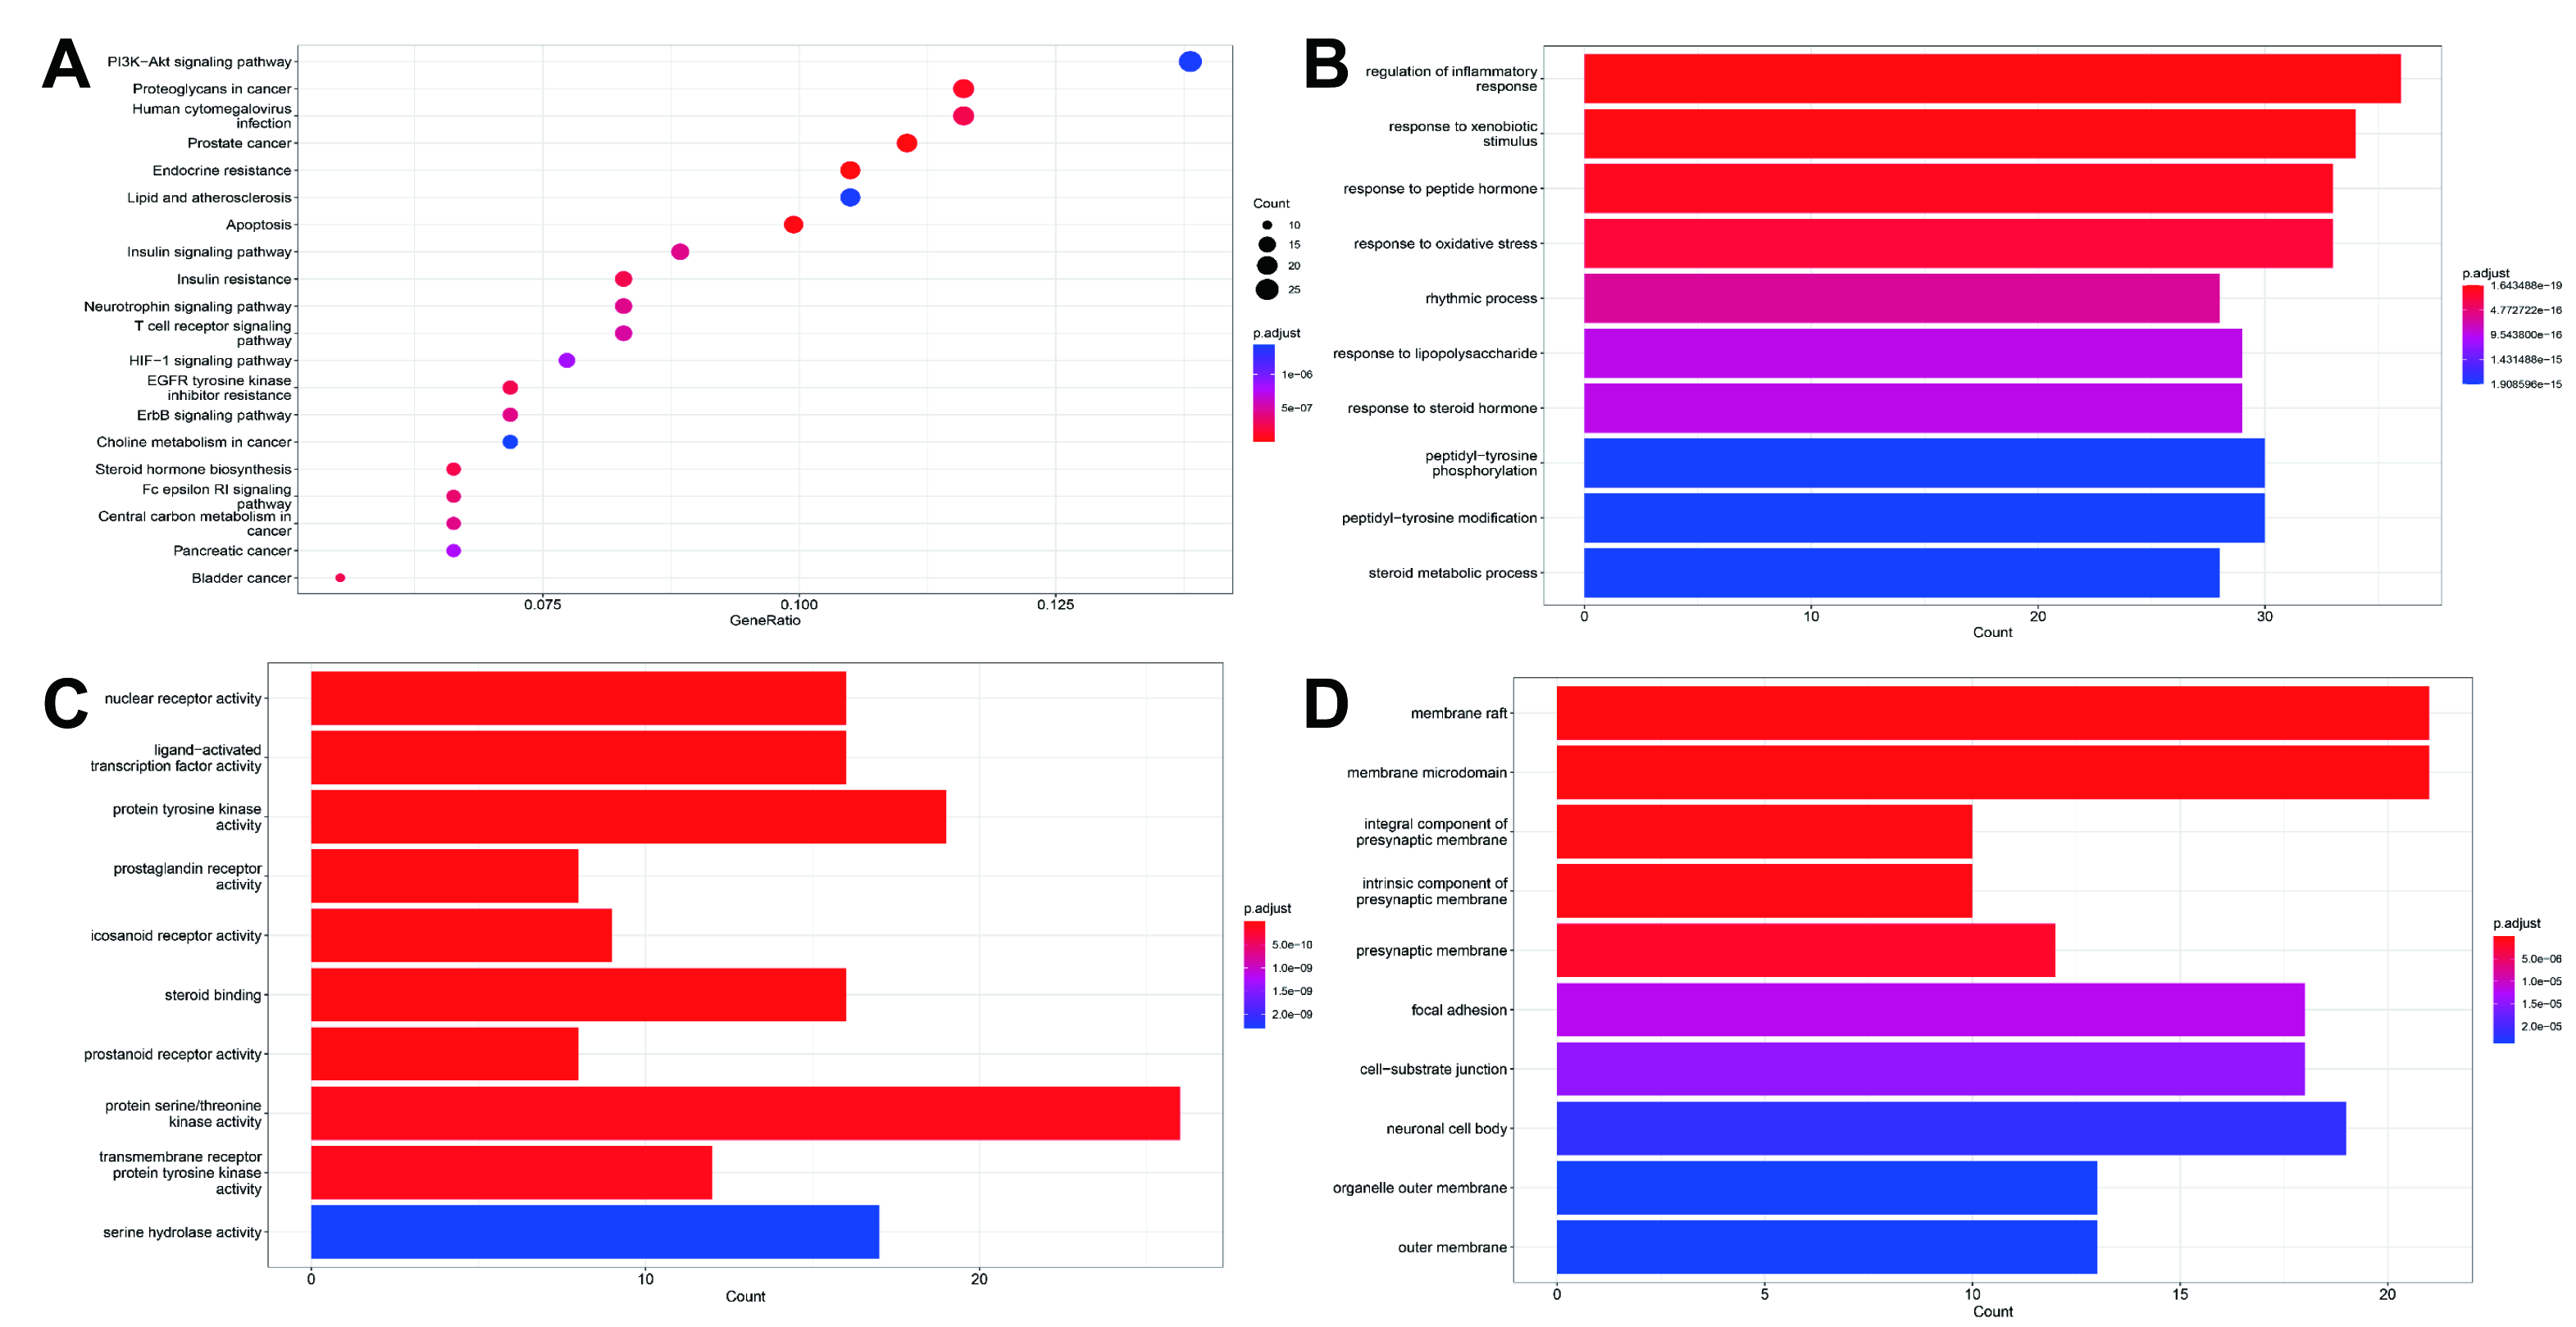


**Fig. S3.** KEGG and GO analysis of interacting targets of RA and the major compound of KCR. (A) KEGG analysis of interacting targets of RA and the major compound of KCR. (B, C and D) GO (BP, MF, and CC) analysis of interacting targets of RA and the major compound of KCR.


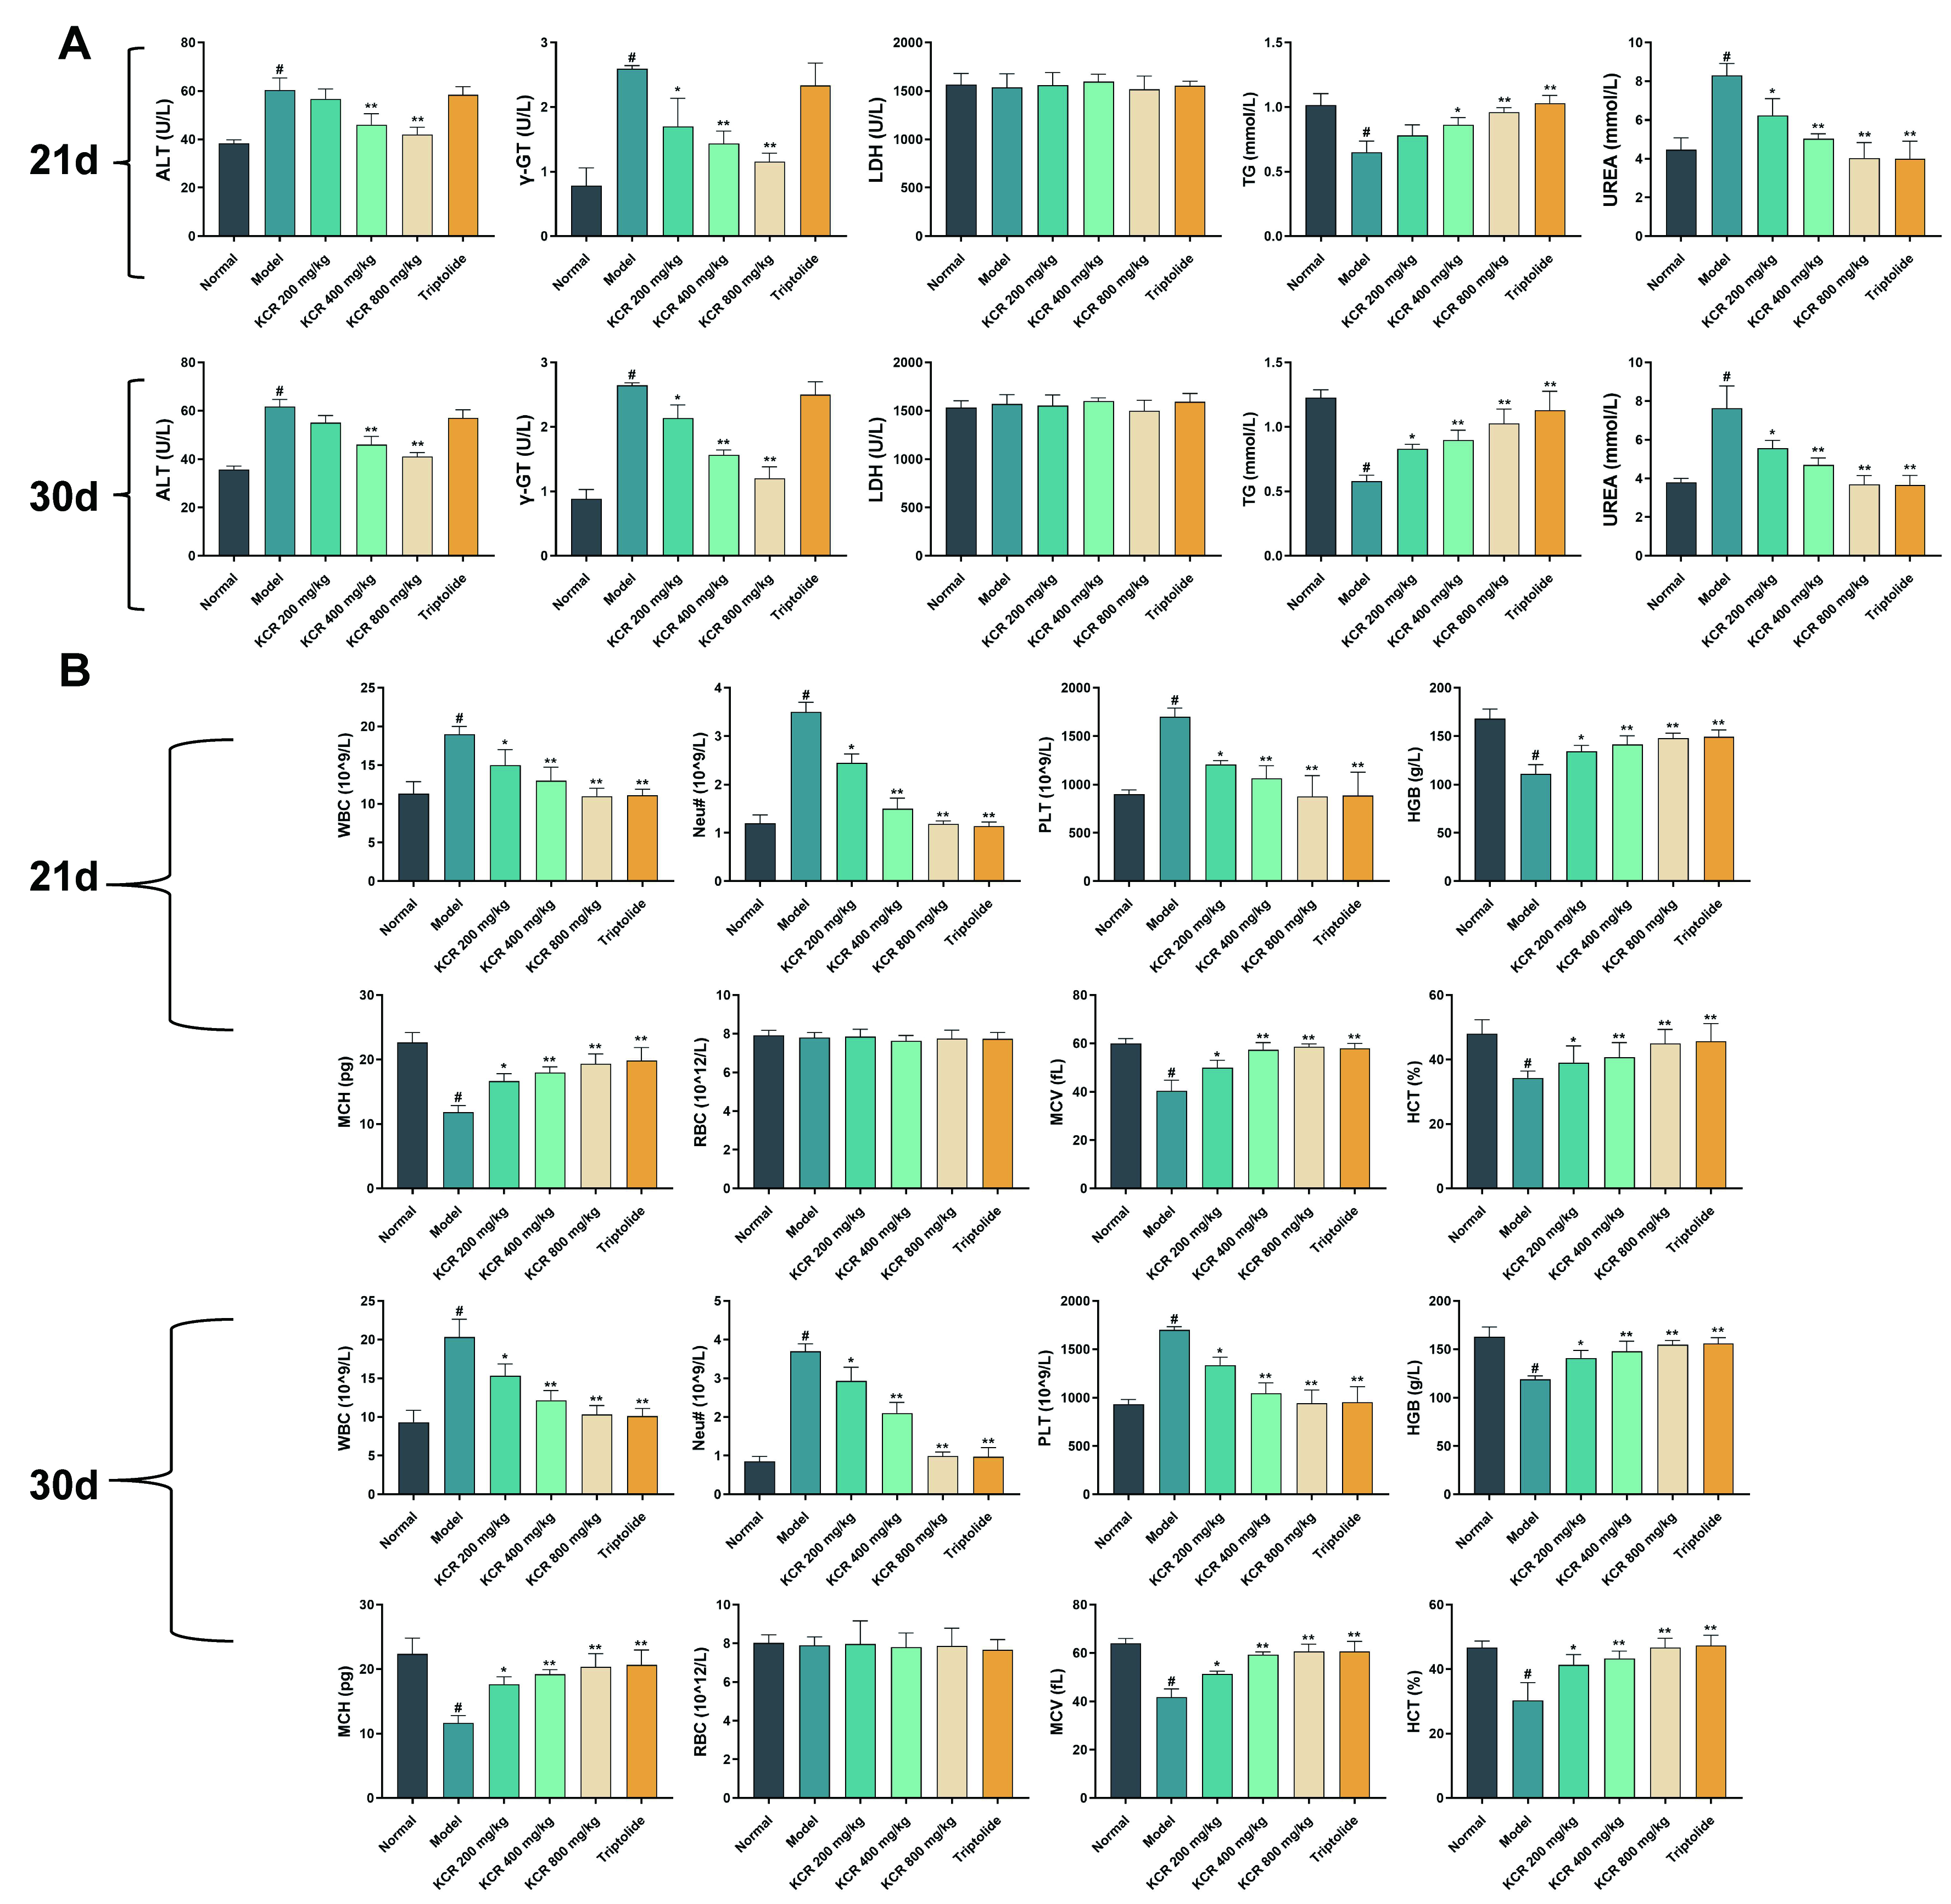


**Fig. S4.** The effects of KCR on physiological indices in AIA rats. (A) ALT, γ-GT, LDH, TG, and UREA of AIA rats in each group. (B) WBC, Neu#, PLT, HGB, MCH, RBC, MCV, and HCT of rats in each group. (C-E) The liver index, spleen index, and thymus index of rats in each group. * *p* < 0.05, ** *p* < 0.01 vs. the Normal group, # *p* < 0.05 vs. the Model group.


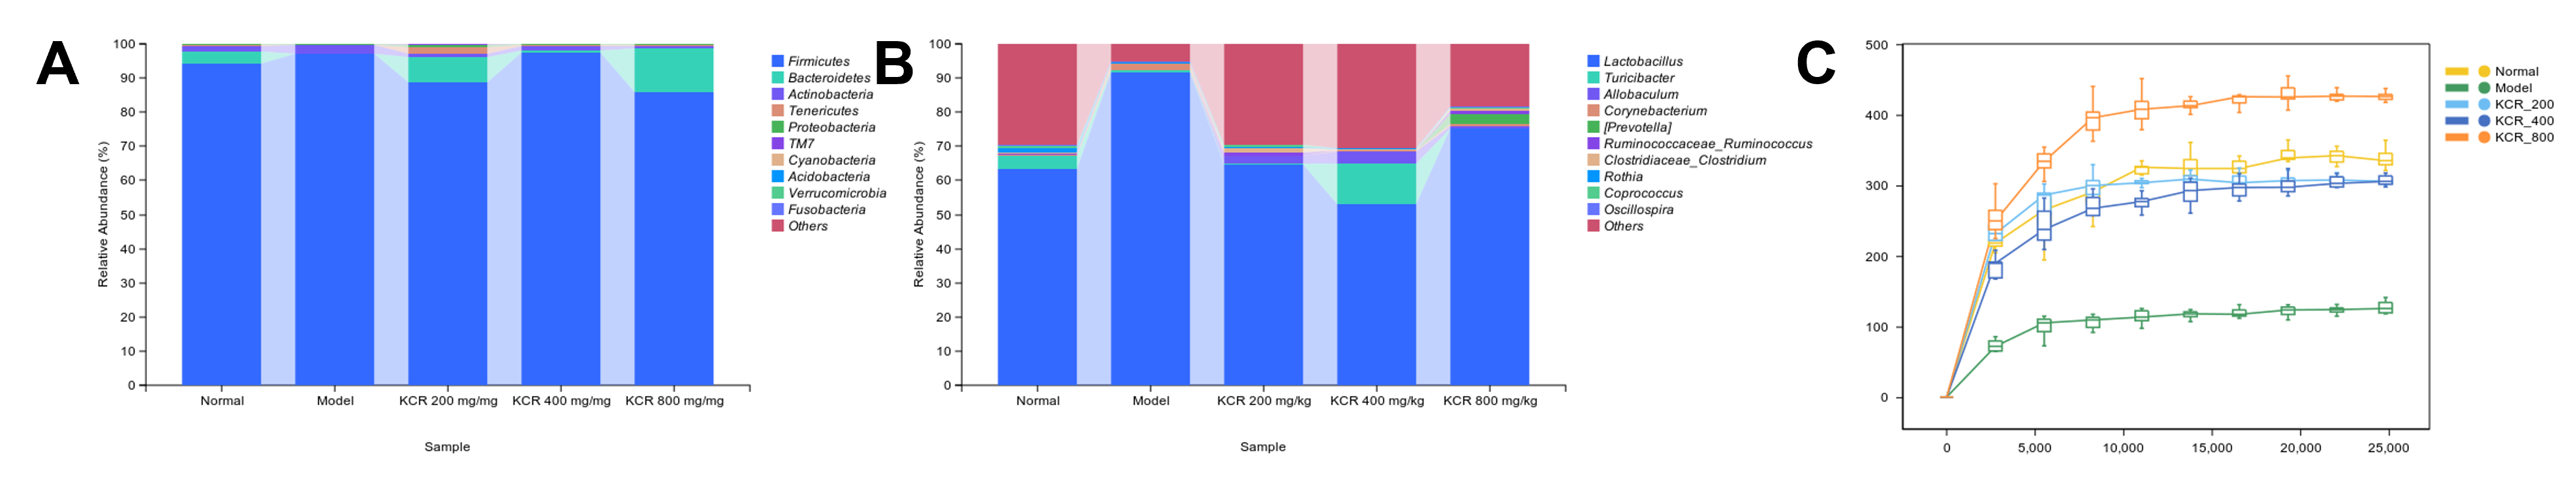


**Fig. S5.** Taxonomic composition profiling of gut microbiota in AIA rats. (A and B) Taxonomic composition analysis of the gut microbiota at the phylum and genus levels. (C) Rarefaction curves for sequenced samples.


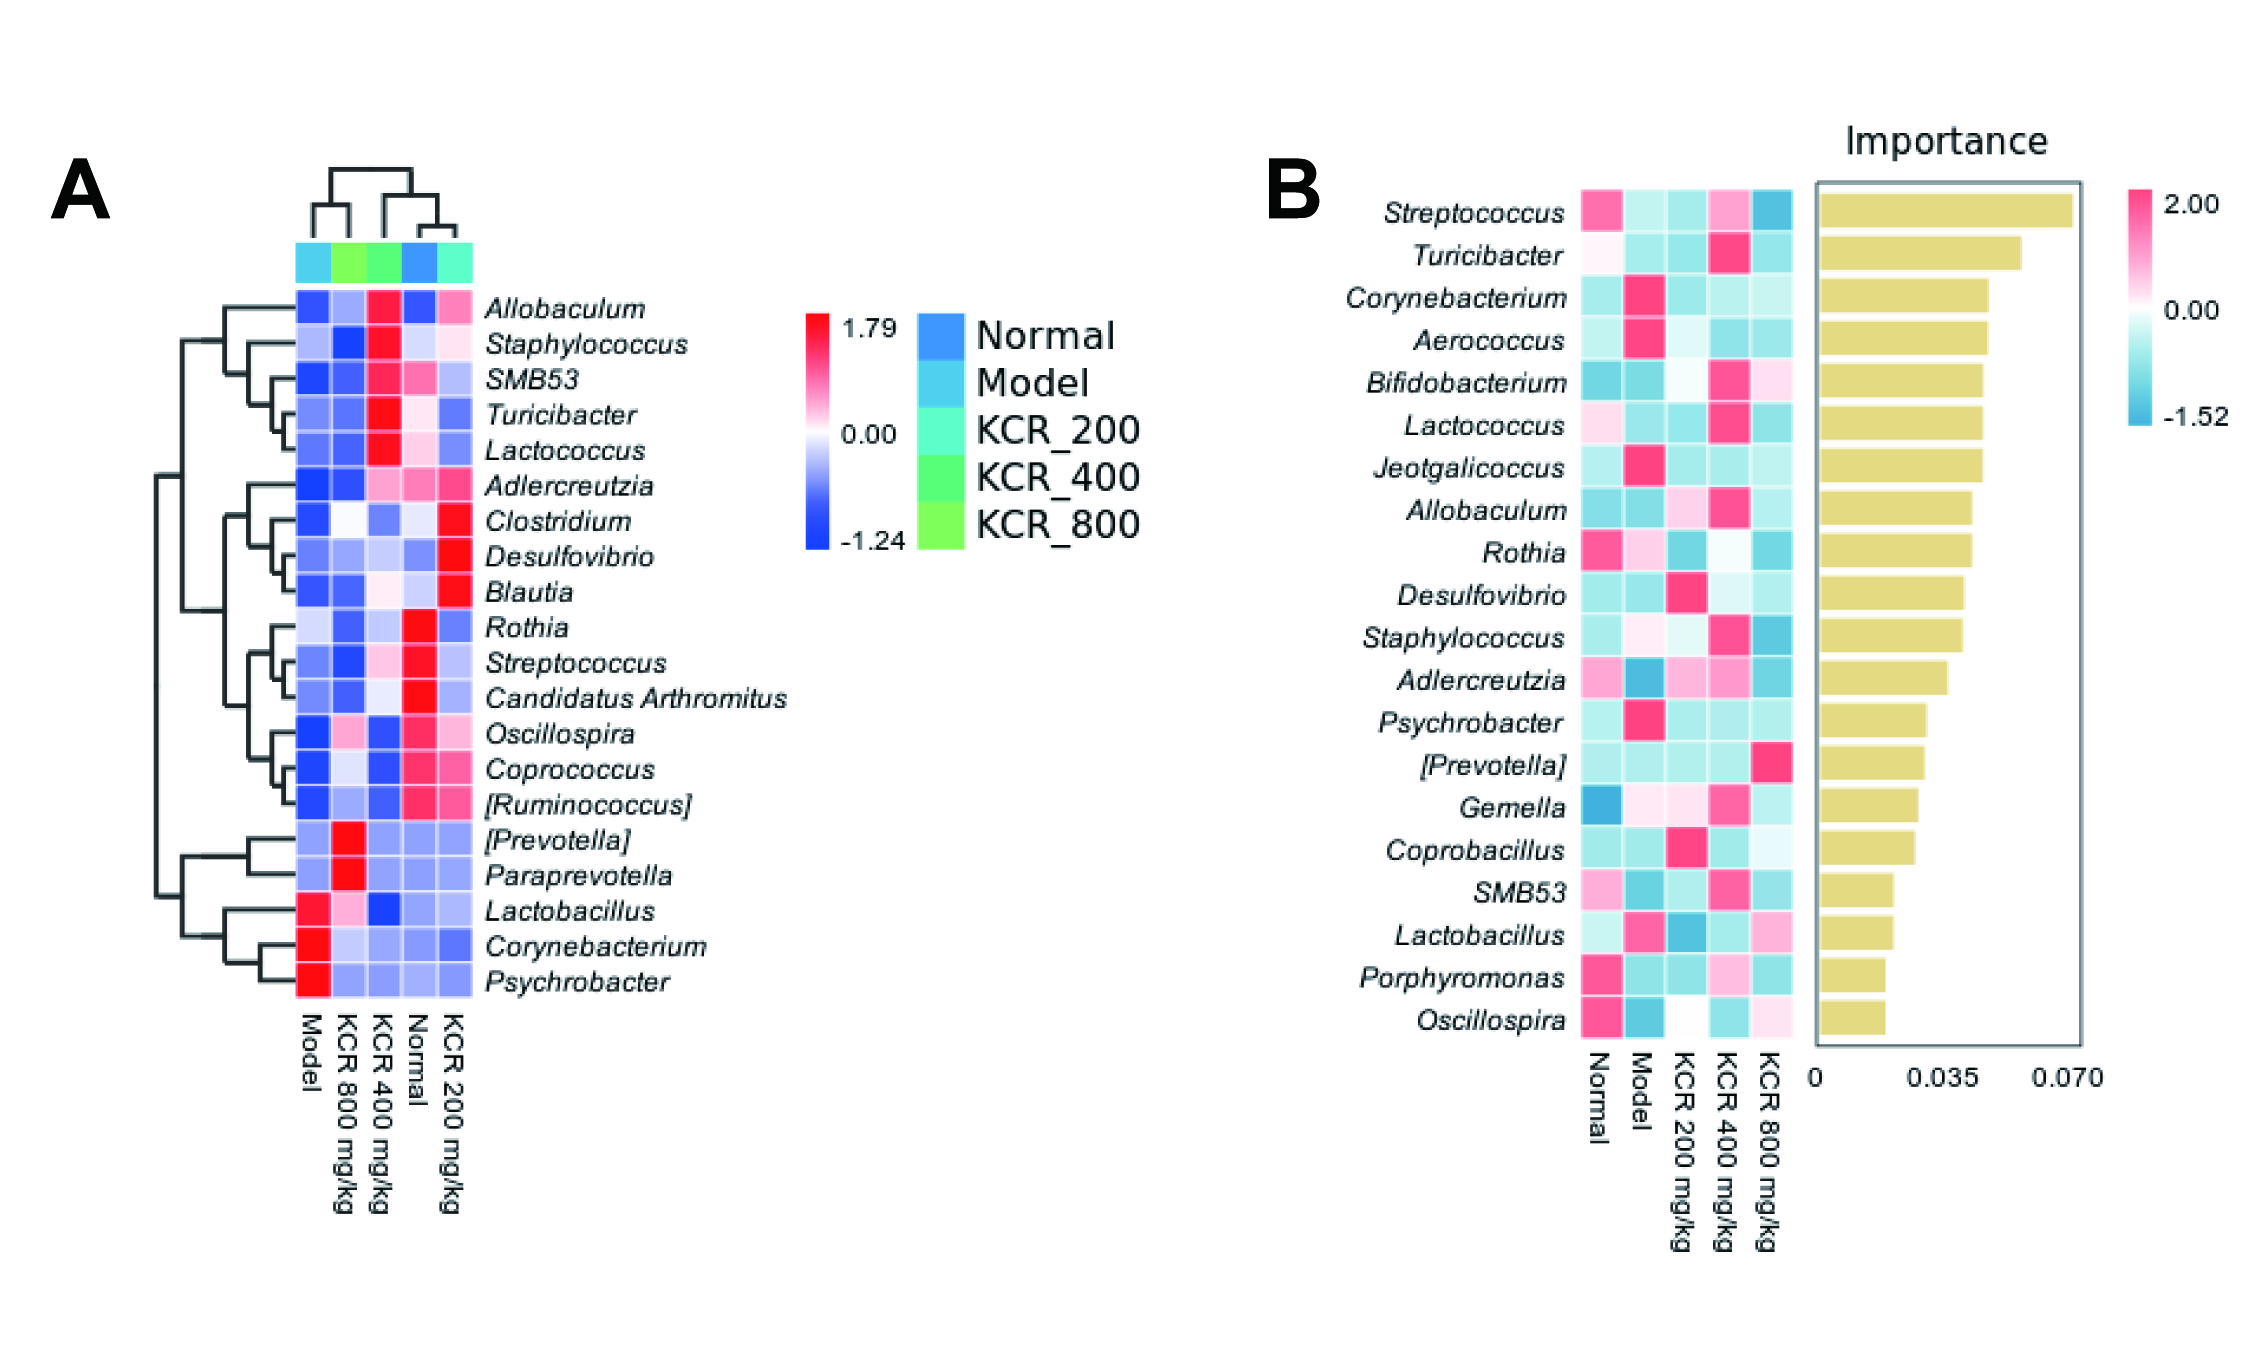
**Fig. S6.** Species variation and marker species analysis of gut microbiota in AIA rats. (A) Heat map of species composition of gut microbiota in AIA rats. (B) Random forest analysis of gut microbiota in AIA rats.
